# Supplementary material for: Increased Epstein–Barr virus in breast milk occurs with subclinical mastitis and HIV shedding
Source: PubMed Central journal article supplement (PMC5058806; doi:10.1097/md.0000000000004005), 2016-07-08
Supplement: medi-95-e4005-s001.pdf [file medi-95-e4005-s001.pdf]

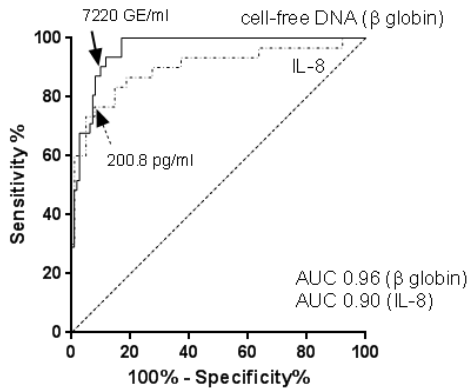

**Supplementary figure 1. Receiver operating characteristic (ROC) curves of human cell-free DNA (solid line) and IL-8 (dotted line) in breast milk for SCM detection ( $Na^+ / K^+ \geq 1.0$  versus  $Na^+ / K^+ < 0.6$ ).** Human cell-free DNA levels had an area under the ROC curve (AUC) of 0.96 (95% CI, 0.93–0.99) with 90.3% sensitivity and 90.2% specificity, corresponding to cell-free DNA level of 7220 GE/ml. IL-8 had an AUC of 0.90 (95% CI, 0.82-0.97) with 76.7% sensitivity and 92.1% specificity corresponding to 200.8 pg/ml concentration.

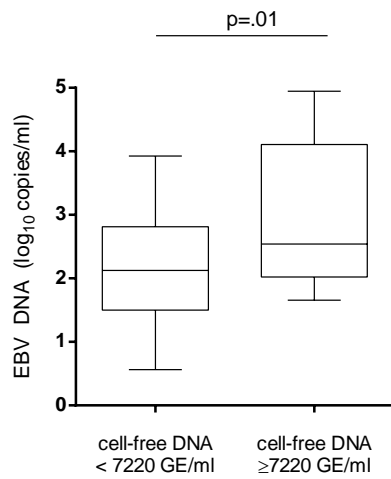

A

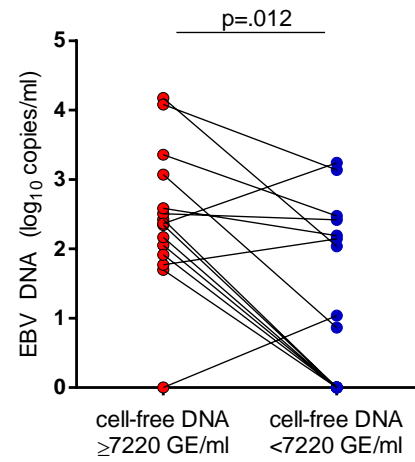

B

**Supplementary figure 2. Relationship between EBV DNA level and SCM in breast milk based on human cell-free DNA level.** A) Breast milk EBV DNA levels according to human cell-free DNA ( $\beta$  globin) threshold for SCM ( $\geq 7220$  GE/ml) in EBV shedding mothers. B) Breast milk EBV DNA levels in EBV shedding mothers with unilateral SCM (human cell-free DNA equivalent  $\geq 7220$  GE/ml). Each pair represents samples collected at the same time from the two mammary glands of one mother.
